# Supplementary material for: Bayesian Parameter Inference and Model Selection by Population Annealing in Systems Biology
Source: PubMed Central journal article supplement (PMC4121267; doi:10.1371/journal.pone.0104057), 2014-08-04

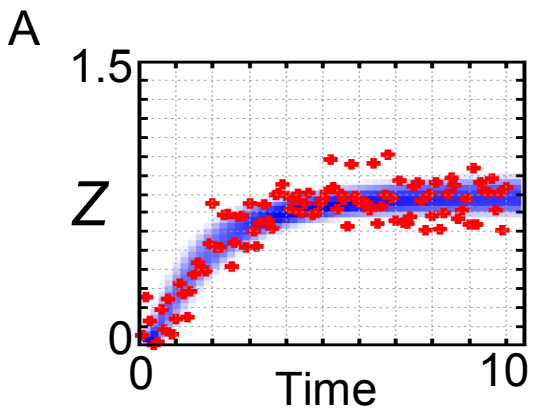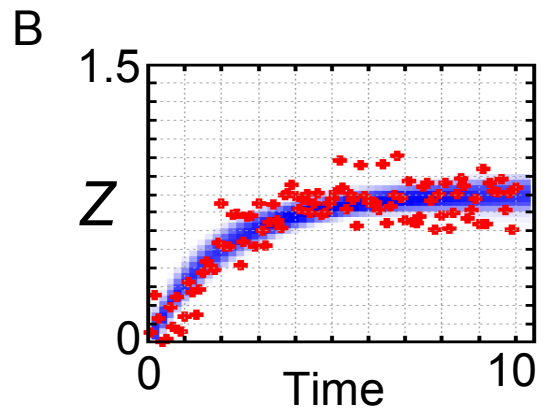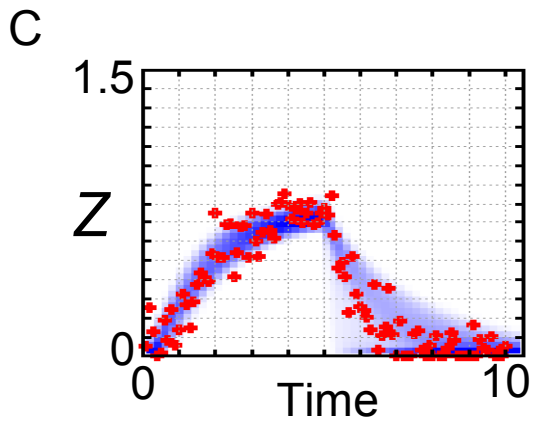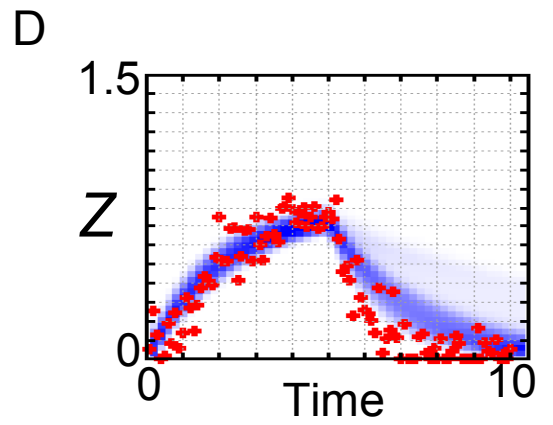

Supplement: pone.0104057.s001.pdf [file pone.0104057.s001.pdf]
