# Supplementary material for: Bayesian Parameter Inference and Model Selection by Population Annealing in Systems Biology
Source: PubMed Central journal article supplement (PMC4121267; doi:10.1371/journal.pone.0104057), 2014-08-04
Supplement: pone.0104057.s002.pdf [file pone.0104057.s002.pdf]

**Table S1. Observed data in response to the step stimulation of X.**

| Time | Z        |
|------|----------|
| 1    | 0.298241 |
| 2    | 0.777959 |
| 3    | 0.780480 |
| 4    | 0.613252 |
| 5    | 0.712871 |
| 6    | 0.865009 |
| 7    | 0.729418 |
| 8    | 0.858996 |
| 9    | 0.633814 |
| 10   | 0.679483 |
