# Supplementary material for: Bayesian Parameter Inference and Model Selection by Population Annealing in Systems Biology
Source: PubMed Central journal article supplement (PMC4121267; doi:10.1371/journal.pone.0104057), 2014-08-04
Supplement: pone.0104057.s004.pdf [file pone.0104057.s004.pdf]

## Text S1. Supporting algorithms.

### 1. Markov chain Monte Carlo (MCMC) algorithm

Markov chain Monte Carlo (MCMC) Metropolis-Hastings algorithm proceeds as follows:

M1. Initialize  $\theta_i$   $i = 0$ .

M2. Propose a candidate value  $\theta^* \sim q(\theta|\theta_i)$  where  $q$  is a proposal distribution.

M3. Set  $\theta_{i+1} = \theta^*$  with following probability  $\alpha$ .

$$\alpha = \min \left\{ 1, \frac{f(D_{obs}|\theta^*, M)\pi(\theta^*|M)q(\theta_i|\theta^*)}{f(D_{obs}|\theta_i, M)\pi(\theta_i|M)q(\theta^*|\theta_i)} \right\}$$

Otherwise set  $\theta_{i+1} = \theta_i$ .

M4. If  $i < Repeat\ number$ , increment  $i = i + 1$  and go to M2.

MCMC algorithm is designed as the stationary distribution is consistent with the posterior distribution  $\pi(\theta|D_{obs}, M)$ .

## 2. ABC-MCMC algorithm

ABC-MCMC algorithm proceeds as follows:

AM1. Initialize  $\theta_i$ ,  $D_{sim|\theta_i}$   $i = 0$ .

AM2. Propose a candidate value  $\theta^* \sim q(\theta|\theta_i)$  where  $q$  is a proposal distribution.

AM3. Simulate  $D_{sim|\theta^*} \sim f(D_{sim}|\theta^*, M)$ .

AM4. Set  $\theta_{i+1} = \theta^*$  and  $D_{sim|\theta_{i+1}} = D_{sim|\theta^*}$  with following probability  $\alpha$ .

$$\alpha = \min \left\{ 1, \frac{f_w(D_{obs} / D_{sim|\theta^*}, \theta^*, M) \pi(\theta^* / M) q(\theta_i / \theta^*)}{f_w(D_{obs} / D_{sim|\theta_i}, \theta_i, M) \pi(\theta_i / M) q(\theta^* / \theta_i)} \right\}$$

Otherwise set  $\theta_{i+1} = \theta_i$  and  $D_{sim|\theta_{i+1}} = D_{sim|\theta_i}$ .

AM5. If  $i < Repeat\ number$ , increment  $i = i + 1$  and go to AM2.

ABC-MCMC algorithm is designed as the stationary distribution is consistent with the augmented posterior distribution  $\pi_{ABC}(\theta, D_{sim} | D_{obs}, M)$ .

### 3. ABC rejection sampler algorithm

ABC rejection sampler algorithm with use of the indicator function as the weighting function ( $f_w(D_{obs}|D_{sim}, \theta, M) \propto I(d(D_{obs}, D_{sim}|\theta) \leq \varepsilon, M)$ ) proceeds as follows:

AR1. Sample  $\theta^* \sim \pi(\theta|M)$ .

AR2. Simulate  $D_{sim|\theta^*} \sim f(D_{sim}|\theta^*, M)$ .

AR3. If  $d(D_{obs}, D_{sim|\theta^*}) \leq \varepsilon$ , accept  $\theta^*$ , otherwise reject.

AR4. Go to AR1.

The samples obtained by ABC rejection sampler follow the augmented posterior distribution  $\pi_{ABC}(\theta, D_{sim}|D_{obs}, M)$  with setting  $f_w(D_{obs}|D_{sim}, \theta, M) \propto I(d(D_{obs}, D_{sim}|\theta) \leq \varepsilon, M)$ .
