# Supplementary material for: Bayesian Parameter Inference and Model Selection by Population Annealing in Systems Biology
Source: PubMed Central journal article supplement (PMC4121267; doi:10.1371/journal.pone.0104057), 2014-08-04
Supplement: pone.0104057.s005.pdf [file pone.0104057.s005.pdf]

## Text S2. Population annealing in the conventional framework.

We show intermediate distributions in the conventional framework that a likelihood function can be defined and evaluated. We define the  $n$ -th ( $0 \leq n \leq N$ ) intermediate distribution as follows

$$f_{IM}^n(\theta) \propto \pi(\theta | D_{obs}, M)^{\beta_n} \pi(\theta | M)^{1-\beta_n} \propto f(D_{obs} | \theta, M)^{\beta_n} \pi(\theta | M) \quad (0 \leq \beta_n \leq 1)$$

$\beta_n$  is a fictitious inverse temperature. As  $\beta_n$  increases (temperature decreases, so-called “annealing”) from 0 to 1, the intermediate distribution gradually changes from the first intermediate distribution ( $\beta_0 = 0$ ) corresponding to the prior distribution, to the last intermediate distribution ( $\beta_N = 1$ ) corresponding to the posterior distribution. The concrete schedule of  $\beta_n$  is determined depending on the problem.
